# Supplementary material for: Role of Endothelial STAT3 in Cerebrovascular Function and Protection from Ischemic Brain Injury
Source: MDPI journal article supplement (doi:10.3390/ijms232012167), 2022-10-12
Supplement: s1 [file s1]

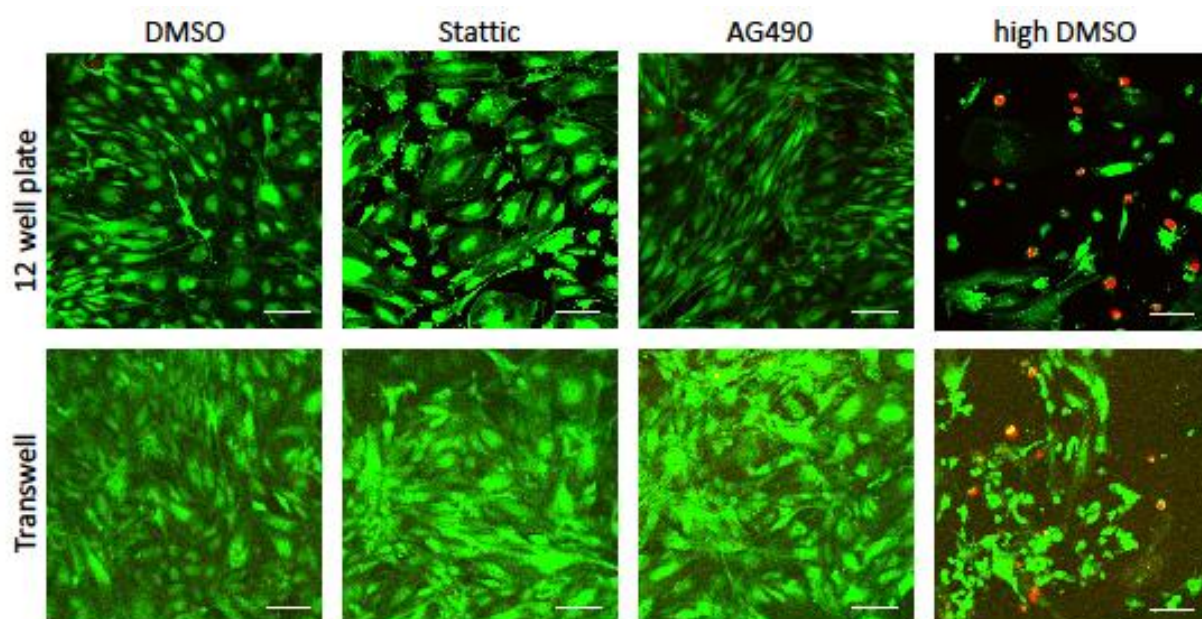

**Figure S1.** Calcein/PI labeling of ECs incubated for 12 h with 5  $\mu\text{M}$  Stattic and 25  $\mu\text{M}$  AG490 (12-well plate) or 1.25  $\mu\text{M}$  Stattic and 12.5  $\mu\text{M}$  AG490 (transwell) demonstrating that these concentrations are sub-lethal. High dose DMSO was used as a positive (cell death) control. Scale bar, 100  $\mu\text{m}$ .
